# Supplementary material
Source: Springer Nature journal article supplement (https://www.springermedizin.de/resource/supplementary/13058_2012_2929_MOESM3_ESM.pdf/9702866)

# A

## MCF-7

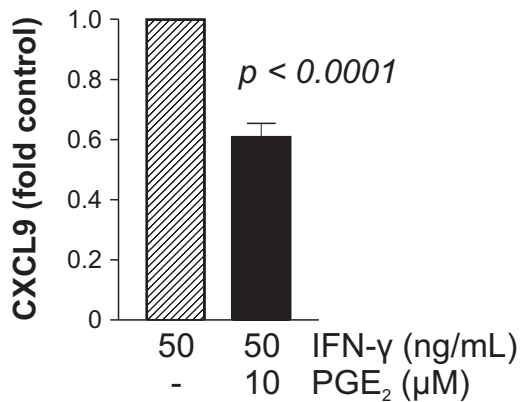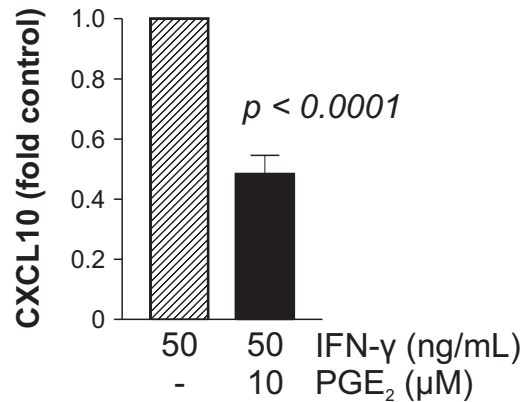

## MDA-MB 231

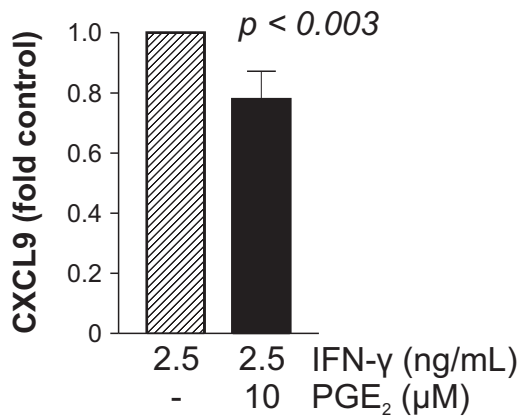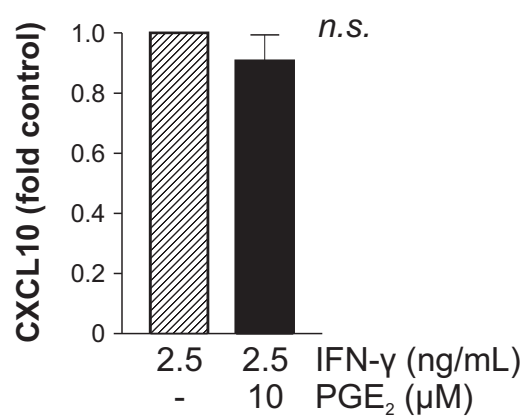

# B

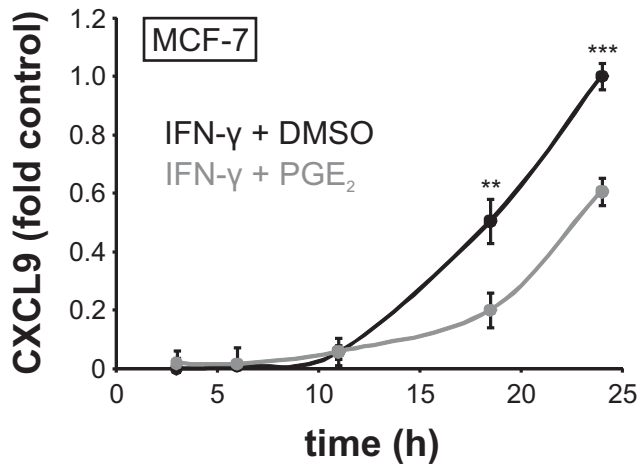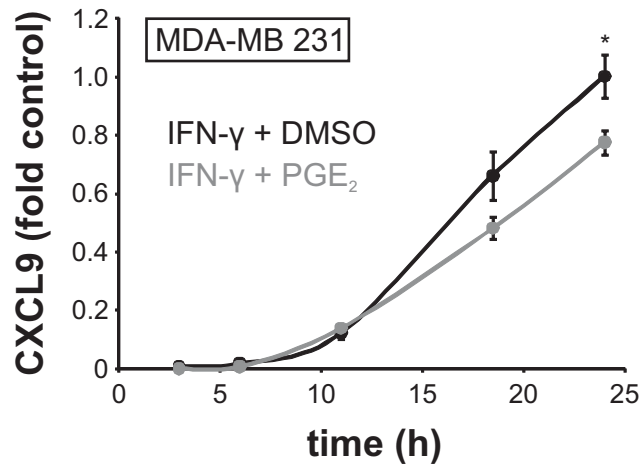

Supplement: MOESM3 [file 9702866]
